# Supplementary material
Source: ML conference proceedings conference paper supplement (https://proceedings.neurips.cc/paper_files/paper/2017/hash/d9fc0cdb67638d50f411432d0d41d0ba-Abstract.html)
Supplement: Supplementary file [file d9fc0cdb67638d50f411432d0d41d0ba-Supplemental.zip]

# Supplemental Material

## Resurrecting the sigmoid in deep learning through dynamical isometry: theory and practice

### 1 Theoretical results

**Result 1.** The  $S$ -transform for  $JJ^T$  is given by,

$$S_{JJ^T} = S_{WW^T}^L \prod_{l=1}^L S_{D_l^2}. \quad (\text{S1})$$

*Proof.* First notice that, by eqn. (9),  $M(z)$  and thus  $S(z)$  depend only on the moments of the distribution. The moments, in turn, can be defined in terms of traces, which are invariant to cyclic permutations, i.e.,

$$\text{tr}(A_1 A_2 \cdots A_m)^k = \text{tr}(A_2 \cdots A_m A_1)^k. \quad (\text{S2})$$

Therefore the  $S$ -transform is invariant to cyclic permutations. Define matrices  $Q$  and  $\tilde{Q}$ ,

$$Q_L \equiv JJ^T = (D_L W_L \cdots D_1 W_1)(D_L W_L \cdots D_1 W_1)^T \quad (\text{S3})$$

$$\tilde{Q}_L \equiv (W_L^T D_L^T D_L W_L)(D_{L-1} W_{L-1} \cdots D_1 W_1)(D_{L-1} W_{L-1} \cdots D_1 W_1)^T \quad (\text{S4})$$

$$= (W_L^T D_L^T D_L W_L) Q_{L-1}, \quad (\text{S5})$$

which are related by a cyclic permutation. Therefore the above argument shows that their  $S$ -transforms are equal, i.e.  $S_{Q_L} = S_{\tilde{Q}_L}$ . Then eqn. (11) implies that,

$$S_{JJ^T} = S_{Q_L} = S_{W_L^T D_L^T D_L W_L} S_{Q_{L-1}} \quad (\text{S6})$$

$$= S_{D_L^T D_L W_L W_L^T} S_{Q_{L-1}} \quad (\text{S7})$$

$$= S_{D_L^2} S_{W_L W_L^T} S_{Q_{L-1}} \quad (\text{S8})$$

$$= \prod_{l=1}^L S_{D_l^2} S_{W_l W_l^T} \quad (\text{S9})$$

$$= S_{WW^T}^L \prod_{l=1}^L S_{D_l^2}, \quad (\text{S10})$$

where the last line follows since each weight matrix is identically distributed.  $\square$

**Example 1.** Products of Gaussian random matrices with variance  $\sigma_w^2$  have the  $S$  transform,

$$S_{WW^T}(z) = \frac{1}{\sigma_w^2(1+z)}. \quad (\text{S11})$$

*Proof.* It is well-known (see, e.g. [16]) that the moments of a Wishart are proportional to the Catalan numbers, i.e.,

$$m_k(WW^T) = \sigma_w^{2k} \frac{1}{k+1} \binom{2k}{k}, \quad (\text{S12})$$

whose generating function is

$$M_{WW^T}(z) = \frac{1}{2} \left( -2 + \frac{z}{\sigma_w^2} - \sqrt{\frac{z}{\sigma_w^2} \left( \frac{z}{\sigma_w^2} - 4 \right)} \right). \quad (\text{S13})$$

It is straightforward to invert this function,

$$M_{WW^T}^{-1}(z) = \sigma_w^2 \frac{(1+z)^2}{z}, \quad (\text{S14})$$

so that, using eqn. (10),

$$S_{WW^T}(z) = \frac{1}{\sigma_w^2(1+z)} \quad (\text{S15})$$

as hypothesized.  $\square$

**Example 2.** The  $S$ -transform of the identity is given by  $S_I = 1$ .

*Proof.* The moments of the identity are all equal to one, so we have,

$$M_I(z) = \sum_{k=1}^{\infty} \frac{1}{z^k} = \frac{1}{z-1}, \quad (\text{S16})$$

whose inverse is,

$$M_I^{-1}(z) = \frac{1+z}{z}, \quad (\text{S17})$$

so that,

$$S_I = 1. \quad (\text{S18})$$

□
